# Supplementary material for: An Appraisal on China’s Feed-In Tariff Policies for PV and Wind Power: Implementation Effects and Optimization
Source: MDPI journal article supplement (doi:10.3390/su15065137), 2023-03-14
Supplement: s1 [file s1]

### Supplementary Materials

**Table S1.** *Net Economic Benefits* and *Net Comprehensive Benefits* (CNY billion) at different level of feed-in tariff.

| Weighted average feed-in tariffs (CNY/kWh) | <i>Conservative scenario</i>      |                              | <i>Neutral scenario</i>           |                              | <i>Positive scenario</i>          |                              |
|--------------------------------------------|-----------------------------------|------------------------------|-----------------------------------|------------------------------|-----------------------------------|------------------------------|
|                                            | <i>Net Comprehensive Benefits</i> | <i>Net Economic Benefits</i> | <i>Net Comprehensive Benefits</i> | <i>Net Economic Benefits</i> | <i>Net Comprehensive Benefits</i> | <i>Net Economic Benefits</i> |
| 0.232                                      | 529.260                           | 344.912                      | 602.341                           | 392.538                      | 661.176                           | 430.881                      |
| 0.250                                      | 540.205                           | 362.912                      | 614.798                           | 413.024                      | 674.850                           | 453.367                      |
| 0.268                                      | 549.821                           | 379.140                      | 625.741                           | 431.492                      | 686.862                           | 473.639                      |
| 0.286                                      | 557.505                           | 393.137                      | 634.485                           | 447.422                      | 696.461                           | 491.126                      |
| 0.304                                      | 562.768                           | 404.520                      | 640.475                           | 460.377                      | 703.036                           | 505.346                      |
| 0.322                                      | <b>565.215</b>                    | 412.968                      | <b>643.260</b>                    | 469.991                      | <b>706.093</b>                    | 515.899                      |
| 0.340                                      | 564.533                           | 418.222                      | 642.485                           | 475.970                      | 705.242                           | 522.462                      |
| 0.359                                      | 560.489                           | <b>420.083</b>               | 637.882                           | <b>478.088</b>               | 700.190                           | <b>524.787</b>               |
| 0.377                                      | 552.919                           | 418.410                      | 629.267                           | 476.185                      | 690.733                           | 522.698                      |
| 0.395                                      | 541.729                           | 413.121                      | 616.531                           | 470.165                      | 676.753                           | 516.090                      |
| 0.413                                      | 526.888                           | 404.189                      | 599.642                           | 459.999                      | 658.214                           | 504.931                      |
| 0.431                                      | 508.430                           | 391.641                      | 578.635                           | 445.719                      | 635.155                           | 489.256                      |
| 0.449                                      | 486.444                           | 375.559                      | 553.613                           | 427.417                      | 607.689                           | 469.166                      |
| 0.467                                      | 461.074                           | 356.073                      | 524.740                           | 405.240                      | 575.996                           | 444.823                      |
| 0.486                                      | 432.514                           | 333.358                      | 492.236                           | 379.389                      | 540.317                           | 416.447                      |
| 0.504                                      | 401.000                           | 307.634                      | 456.370                           | 350.112                      | 500.948                           | 384.310                      |
